# Supplementary material for: Rolling the Dice: A Comprehensive Review of the New Forms of Gambling and Psychological Clinical Recommendations
Source: MDPI journal article supplement (doi:10.3390/psychiatryint4020014), 2023-05-03
Supplement: s1 [file s1]

## Online Gambling Diagnostic Questionnaire

(OGD-Q; González-Cabrera, Machimbarrena, Beranuy, Pérez-Rodríguez, Fernández-González and Calvete, 2020).

In the following quiz you will find statements related to online gambling. This refers to all online games where luck is involved, e.g. online poker games, online bingo, online bookmakers and even the purchase of envelopes, boxes or chests in video games (FIFA, Hearthstone: Heroes of Warcraft, CS-GO, etc.). Any expenditure of money to buy a bet where you don't know whether or not you will win the desired prize can be considered online gambling. With that in mind, please answer these questions:

|                                                                                                                                                                                                                                                           | <i>Never</i> | <i>At<br/>on<br/>occasio<br/>n<br/>on time</i> | <i>Often</i> | <i>Very often</i> | <i>Every<br/>day</i> |
|-----------------------------------------------------------------------------------------------------------------------------------------------------------------------------------------------------------------------------------------------------------|--------------|------------------------------------------------|--------------|-------------------|----------------------|
| 1. Do you feel the need to spend more and more money in order to get the high you want?                                                                                                                                                                   | 1            | 2                                              | 3            | 4                 | 5                    |
| 2. Do you feel nervous, irritated or angry when you try to reduce or quit online gambling?                                                                                                                                                                | 1            | 2                                              | 3            | 4                 | 5                    |
| 3. Have you tried to control, reduce or stop gambling? online and you have not been able to do it?                                                                                                                                                        | 1            | 2                                              | 3            | 4                 | 5                    |
| 4. Have you ever felt that online gambling has had negative consequences on a personal, social, family or social level? academic/labour, and yet you have continued to play?                                                                              | 1            | 2                                              | 3            | 4                 | 5                    |
| 5. Do you often think about online gambling, e.g. remembering past bets, planning your next bets, thinking about ways to win more money playing online, reliving some moments related to gambling? online gambling, etc.?                                 | 1            | 2                                              | 3            | 4                 | 5                    |
| 6. Do you gamble or play online gambling games when you are sad, anxious or feel guilty, to make yourself feel better? or stop thinking about how you feel?                                                                                               | 1            | 2                                              | 3            | 4                 | 5                    |
| 7. Do you feel that you have little control over online gambling (e.g. gambling more than you would like to, spending more money than you would like to, gambling on sites where you shouldn't do that, not be able to stop playing when you want to...)? | 1            | 2                                              | 3            | 4                 | 5                    |
| 8. After losing money on a bet or in a gambling game online, do you usually play again to try to get that money back?                                                                                                                                     | 1            | 2                                              | 3            | 4                 | 5                    |
| 9. Do you lie to others to hide how much time you spend playing or how much do you really spend on online gambling?                                                                                                                                       | 1            | 2                                              | 3            | 4                 | 5                    |
| 10. Have you ever asked someone for money to improve or overcome a bad situation? economic situation that online gambling has caused you?                                                                                                                 | 1            | 2                                              | 3            | 4                 | 5                    |
| 11. Did you feel that you prioritised gambling over other areas of your life that had previously been more important (e.g. studying, going out with friends, sleeping less if you gamble, etc.)? night, etc.)?                                            | 1            | 2                                              | 3            | 4                 | 5                    |

12. If you have marked that you have felt some of the above situations (you feel the need to spend more money, you feel bad when you stop gambling, you feel that gambling has negative consequences, you often think about online gambling, you feel you have little control over gambling, you keep gambling even if you have lost money, etc.). **How long have you felt this way?**

- More than twelve months ago
- More than six months ago
- More than a month ago
- Recently
